# Supplementary material for: Therapeutic Targets and Mechanism of Xingpi Jieyu Decoction in Depression: A Network Pharmacology Study
Source: Evid Based Complement Alternat Med. 2021 Jun 23;2021:5516525. doi: 10.1155/2021/5516525 (PMC8249129; doi:10.1155/2021/5516525)
Supplement: Supplementary Materials — Figure 6 data: GO enrichment analysis data for the overlapping targets needed to draw Figure 6. Figure 7 data: KEGG pathway enrichment data for the overlapping targets needed to draw Figure 7. [file 5516525.f1.zip › 5516525.f1/Figure 6 data.txt]

GO	Category	Description	Count	%	Log10(P)	Log10(q)
GO:0071396	GO Biological Processes	cellular response to lipid	13	30.95	-12.04	-8.13
GO:0097190	GO Biological Processes	apoptotic signaling pathway	13	30.95	-11.81	-8.09
GO:0051090	GO Biological Processes	regulation of DNA-binding transcription factor activity	11	26.19	-10.44	-6.85
GO:1903793	GO Biological Processes	positive regulation of anion transport	11	26.19	-10.1	-6.6
GO:0018105	GO Biological Processes	peptidyl-serine phosphorylation	9	21.43	-9.16	-5.81
GO:0006954	GO Biological Processes	inflammatory response	11	26.19	-7.88	-4.97
GO:0010883	GO Biological Processes	regulation of lipid storage	5	11.9	-7.68	-4.81
GO:0070997	GO Biological Processes	neuron death	8	19.05	-7.44	-4.63
GO:0045596	GO Biological Processes	negative regulation of cell differentiation	10	23.81	-7.42	-4.63
GO:0000302	GO Biological Processes	response to reactive oxygen species	7	16.67	-7.4	-4.63
GO:0007268	GO Biological Processes	chemical synaptic transmission	10	23.81	-7.3	-4.63
GO:0033674	GO Biological Processes	positive regulation of kinase activity	9	21.43	-6.67	-4.16
GO:0003013	GO Biological Processes	circulatory system process	9	21.43	-6.63	-4.12
GO:0051046	GO Biological Processes	regulation of secretion	9	21.43	-6.6	-4.11
GO:0032787	GO Biological Processes	monocarboxylic acid metabolic process	9	21.43	-6.43	-4
GO:0040008	GO Biological Processes	regulation of growth	9	21.43	-6.42	-3.99
GO:0071868	GO Biological Processes	cellular response to monoamine stimulus	5	11.9	-6.32	-3.94
GO:0042493	GO Biological Processes	response to drug	7	16.67	-6.02	-3.77
GO:0018108	GO Biological Processes	peptidyl-tyrosine phosphorylation	7	16.67	-5.94	-3.72
GO:0044057	GO Biological Processes	regulation of system process	8	19.05	-5.64	-3.52
GO:0098794	GO Cellular Components	postsynapse	9	21.43	-6.67	-3.39
GO:0043235	GO Cellular Components	receptor complex	8	19.05	-5.94	-2.96
GO:0016607	GO Cellular Components	nuclear speck	5	11.9	-3.45	-0.87
GO:0045211	GO Cellular Components	postsynaptic membrane	4	9.52	-3.19	-0.69
GO:0045121	GO Cellular Components	membrane raft	4	9.52	-2.86	-0.48
GO:0090575	GO Cellular Components	RNA polymerase II transcription regulator complex	3	7.14	-2.68	-0.42
GO:0005911	GO Cellular Components	cell-cell junction	4	9.52	-2.24	-0.07
GO:0005496	GO Molecular Functions	steroid binding	8	19.05	-11.69	-8.02
GO:0042562	GO Molecular Functions	hormone binding	5	11.9	-6.79	-3.89
GO:0019901	GO Molecular Functions	protein kinase binding	9	21.43	-6.35	-3.52
GO:0016709	GO Molecular Functions	oxidoreductase activity, acting on paired donors, with incorporation or reduction of molecular oxygen, NAD(P)H as one donor, and incorporation of one atom of oxygen	4	9.52	-6.1	-3.33
GO:0004672	GO Molecular Functions	protein kinase activity	8	19.05	-5.73	-3.06
GO:0098960	GO Molecular Functions	postsynaptic neurotransmitter receptor activity	4	9.52	-5.65	-3.02
GO:0031625	GO Molecular Functions	ubiquitin protein ligase binding	6	14.29	-5.34	-2.74
GO:0071813	GO Molecular Functions	lipoprotein particle binding	3	7.14	-4.91	-2.47
GO:0140297	GO Molecular Functions	DNA-binding transcription factor binding	6	14.29	-4.72	-2.33
GO:0070851	GO Molecular Functions	growth factor receptor binding	4	9.52	-4.24	-1.99
