# Supplementary material for: Therapeutic Targets and Mechanism of Xingpi Jieyu Decoction in Depression: A Network Pharmacology Study
Source: Evid Based Complement Alternat Med. 2021 Jun 23;2021:5516525. doi: 10.1155/2021/5516525 (PMC8249129; doi:10.1155/2021/5516525)
Supplement: Supplementary Materials — Figure 6 data: GO enrichment analysis data for the overlapping targets needed to draw Figure 6. Figure 7 data: KEGG pathway enrichment data for the overlapping targets needed to draw Figure 7. [file 5516525.f1.zip › 5516525.f1/Figure 7 data.txt]

#Term	Database	ID	Input number	Background number	P-Value	Corrected P-Value	Input
PI3K-Akt signaling pathway	KEGG PATHWAY	hsa04151	11	354	1.06E-11	3.00E-10	ENSG00000109471|ENSG00000181072|ENSG00000112715|ENSG00000142208|ENSG00000082701|ENSG00000065361|ENSG00000164867|ENSG00000145675|ENSG00000136244|ENSG00000132155|ENSG00000154229
Relaxin signaling pathway	KEGG PATHWAY	hsa04926	9	130	1.07E-12	4.88E-11	ENSG00000100906|ENSG00000107643|ENSG00000112715|ENSG00000142208|ENSG00000170345|ENSG00000164867|ENSG00000145675|ENSG00000132155|ENSG00000154229
MAPK signaling pathway	KEGG PATHWAY	hsa04010	8	296	2.70E-08	1.57E-07	ENSG00000107643|ENSG00000112715|ENSG00000142208|ENSG00000186868|ENSG00000065361|ENSG00000170345|ENSG00000132155|ENSG00000154229
Endocrine resistance	KEGG PATHWAY	hsa01522	7	96	3.03E-10	4.35E-09	ENSG00000091831|ENSG00000107643|ENSG00000140009|ENSG00000142208|ENSG00000170345|ENSG00000145675|ENSG00000132155
AGE-RAGE signaling pathway in diabetic complications	KEGG PATHWAY	hsa04933	7	100	3.97E-10	4.92E-09	ENSG00000107643|ENSG00000112715|ENSG00000142208|ENSG00000164867|ENSG00000145675|ENSG00000136244|ENSG00000154229
HIF-1 signaling pathway	KEGG PATHWAY	hsa04066	7	110	7.47E-10	7.78E-09	ENSG00000112715|ENSG00000142208|ENSG00000164867|ENSG00000145675|ENSG00000136244|ENSG00000100644|ENSG00000154229
Dopaminergic synapse	KEGG PATHWAY	hsa04728	7	131	2.38E-09	2.05E-08	ENSG00000189221|ENSG00000107643|ENSG00000142208|ENSG00000082701|ENSG00000069696|ENSG00000170345|ENSG00000154229
Estrogen signaling pathway	KEGG PATHWAY	hsa04915	7	137	3.20E-09	2.44E-08	ENSG00000091831|ENSG00000140009|ENSG00000142208|ENSG00000170345|ENSG00000164867|ENSG00000145675|ENSG00000132155
Focal adhesion	KEGG PATHWAY	hsa04510	7	199	3.82E-08	2.04E-07	ENSG00000107643|ENSG00000112715|ENSG00000142208|ENSG00000082701|ENSG00000145675|ENSG00000132155|ENSG00000154229
cAMP signaling pathway	KEGG PATHWAY	hsa04024	7	213	5.99E-08	2.89E-07	ENSG00000100906|ENSG00000181072|ENSG00000142208|ENSG00000170345|ENSG00000145675|ENSG00000132155|ENSG00000107643
TNF signaling pathway	KEGG PATHWAY	hsa04668	6	113	3.75E-08	2.04E-07	ENSG00000100906|ENSG00000107643|ENSG00000142208|ENSG00000170345|ENSG00000145675|ENSG00000136244
Ras signaling pathway	KEGG PATHWAY	hsa04014	6	232	2.22E-06	8.30E-06	ENSG00000107643|ENSG00000112715|ENSG00000142208|ENSG00000145675|ENSG00000132155|ENSG00000154229
Neuroactive ligand-receptor interaction	KEGG PATHWAY	hsa04080	6	338	1.82E-05	5.06E-05	ENSG00000120907|ENSG00000181072|ENSG00000022355|ENSG00000113580|ENSG00000069696|ENSG00000120903
FoxO signaling pathway	KEGG PATHWAY	hsa04068	5	132	2.77E-06	9.79E-06	ENSG00000145675|ENSG00000136244|ENSG00000132155|ENSG00000107643|ENSG00000142208
Jak-STAT signaling pathway	KEGG PATHWAY	hsa04630	5	163	7.50E-06	2.32E-05	ENSG00000145675|ENSG00000109471|ENSG00000136244|ENSG00000132155|ENSG00000142208
Calcium signaling pathway	KEGG PATHWAY	hsa04020	5	191	1.58E-05	4.54E-05	ENSG00000154229|ENSG00000120907|ENSG00000164867|ENSG00000181072|ENSG00000065361
Rap1 signaling pathway	KEGG PATHWAY	hsa04015	5	211	2.52E-05	6.66E-05	ENSG00000145675|ENSG00000132155|ENSG00000112715|ENSG00000154229|ENSG00000142208
Regulation of actin cytoskeleton	KEGG PATHWAY	hsa04810	3	216	0.00533806	0.008388381	ENSG00000145675|ENSG00000132155|ENSG00000181072
Gap junction	KEGG PATHWAY	hsa04540	2	88	0.009355389	0.01342295	ENSG00000132155|ENSG00000154229
Arachidonic acid metabolism	KEGG PATHWAY	hsa00590	1	64	0.100029484	0.111897389	ENSG00000165841
